# Supplementary material for: Accounting for spatial habitat and management boundaries when estimating forest bird population distribution and density: inferences from a soap film smoother
Source: PeerJ journal article supplement (doi:10.7717/peerj.15558), 2023-06-14
Supplement: Soap_film_smoother_PeerJ_79645-R1rev_appendices.pdf [file Soap_film_smoother_PeerJ_79645-R1rev_appendices.pdf]

498 **SUPPLEMENTAL MATERIALS**

499 (available online as Supporting Online Information Appendix at <URL>).  
500 Camp, R.J., D.L. Miller, S.T. Buckland, and S.J. Kendall. Soap film smoothers to estimate bird abundances.  
501 The findings and conclusions in this article are those of the author(s) and do not necessarily represent the  
502 views of the U.S. Fish and Wildlife Service. Any use of trade, firm, or product names is for descriptive  
503 purposes only and does not imply endorsement by the U.S. Government.

504 **Supporting Online Information Appendix A**

505 In a preliminary analysis we selected among Poisson, negative binomial and Tweedie distributions to  
506 model the response distribution. These analyses were performed on a TPRS smooth and the selected  
507 distribution was applied to the soap film smoother. We restricted the Tweedie distribution power parameter  
508 to  $p = (1.1, 2)$  following recommendations provided in the `mgcv`, version 1.8-17, package help pages  
509 and used a method of bisection to approximately identify the likelihood maximum. Sensitivity to the  
510 choice of response distribution and model assumptions were checked through inspection of the deviance  
511 residuals following approaches suggested by Wood (2017). Akaike’s information criterion (AIC) was  
512 used to select among distributions.

513 We chose the negative binomial distribution with log-link for modelling the 2002 'Ākepa spatial  
514 patterns. This model provided a reasonably good fit to the residuals (Supporting Online Information  
515 Appendix A Figs. 1–3). The AIC value for the negative-binomial distributed model was about 2 AIC units  
516 larger than the Poisson distributed model (Supporting Online Information Appendix A Table 1). Thus,  
517 AIC alone could not be used to select between these two models (Burnham and Anderson, 2002). AIC  
518 statistics clearly eliminated the Tweedie distribution (Supporting Online Information Appendix A Table  
519 1). QQ-plots showed the negative binomial distribution did a better job of following the identity line from  
520 the smallest through middle values than the other two models (Supporting Online Information Appendix  
521 A Fig. 1). All three models deviated at the largest values. Therefore, we based our model selection on the  
522 QQ-plots.

523 Diagnostic plots for the negative binomial distribution fitted with soap film model formulation to  
524 the 2002 'Ākepa data indicated the model adequately fit the data. Inspection of residual diagnostic  
525 plots appeared reasonable with acceptable behaviour for the deviance residuals and error distribution  
526 (Supporting Online Information Appendix A Figs. 2 and 3). The diagnostics of the soap film residuals are  
527 very similar to those of the TPRS model where the QQ-plot is very close to the straight line indicating  
528 that the distribution is reasonable (Supporting Online Information Appendix A Fig. 2, top left panel), the  
529 residuals versus linear predictor values appears to be reasonable with a strong banding pattern (Supporting  
530 Online Information Appendix A Fig. 2, top right panel), the histogram of residuals approximates normality  
531 with a spike at zero (Supporting Online Information Appendix A Fig. 2, bottom left panel), and the  
532 diagonal pattern in the response versus fitted values draws into question the assumption of constant  
533 variance (Supporting Online Information Appendix A Fig. 2, bottom right panel). Points from the  
534 sorted deviance residuals seem to fall about the straight line and well within the simulated theoretical  
535 quantiles band of grey lines, which provides evidence the numbers came for the theoretical distribution  
536 (Supporting Online Information Appendix A Fig. 3). Effect plots for the soap film model terms are shown  
537 in Supporting Online Information Appendix A Fig. 4, while a description of the effects is presented in the  
538 text.

539 Diagnostic plots for the negative binomial distribution fitted with the TPRS model formulation to the

**Supporting Online Information Appendix A Table 1.** Model selection statistics for the Poisson, negative binomial and Tweedie distributions. Presented are the smoother log-likelihood (logLik), effective degrees of freedom (EDF), Akaike’s information criterion (AIC), and  $\Delta$  AIC.

| Model             | logLik   | EDF    | AIC     | $\Delta$ AIC |
|-------------------|----------|--------|---------|--------------|
| Poisson           | -275.961 | 20.754 | 593.432 | 0            |
| negative binomial | -276.677 | 21.107 | 595.569 | 2.137        |
| Tweedie           | -293.101 | 20.920 | 628.043 | 34.611       |

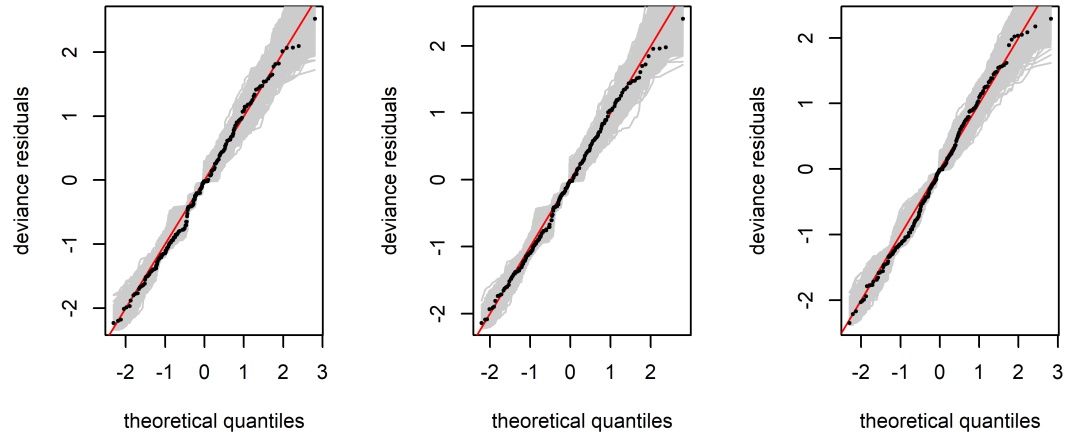

**Supporting Online Information Appendix A Figure 1.** QQ plots of sorted deviance residuals (black dots) for the spatial GAM against theoretical quantiles (grey lines; 1,000 replicates) fitted with the Poisson (left panel), negative binomial (middle panel) and Tweedie (right panel) distributions to the 2002 'Ākepa *Loxops coccineus* count data from a TPRS model.

**Supporting Online Information Appendix A Table 2.** Effective degrees of freedom (EDF), reference degrees of freedom (rf), and basis complexity (*k*-index) for each term in the TPRS smooth spatial model.

| Term                 | EDF   | rf  | <i>k</i> -index |
|----------------------|-------|-----|-----------------|
| s(Easting, Northing) | 18.59 | 126 | 1.02            |

540 2002 'Ākepa data (Supporting Online Information Appendix A Figs. 1 and 5). The QQ-plot is very close  
 541 to the straight line indicating that the distribution is reasonable (Supporting Online Information Appendix  
 542 A Fig. 5, top left panel), the residuals versus linear predictor values appears to be reasonable, although  
 543 strong banding patterns are obvious (Supporting Online Information Appendix A Fig. 5, top right panel),  
 544 the histogram of residuals approximates normality with a spike at zero (Supporting Online Information  
 545 Appendix A Fig. 5, bottom left panel), and the diagonal pattern in the response versus fitted values reveals  
 546 that the assumption of constant variance is questionable, again with a strong banding pattern (Supporting  
 547 Online Information Appendix A Fig. 5, bottom right panel). Points from the sorted deviance residuals  
 548 seem to fall about the straight line and well within the simulated theoretical quantiles band of grey lines,  
 549 which provides evidence the numbers came for the theoretical distribution (Supporting Online Information  
 550 Appendix A Fig. 6).

551 Effect plots for the TPRS model term is shown in Supporting Online Information Appendix A Fig.  
 552 7. The EDF on the `Easting` and `Northing` smooth term was greater than zero, significant and  
 553 the function was nonlinear (Supporting Online Information Appendix A Table 2; Supporting Online  
 554 Information Appendix A Fig. 7).

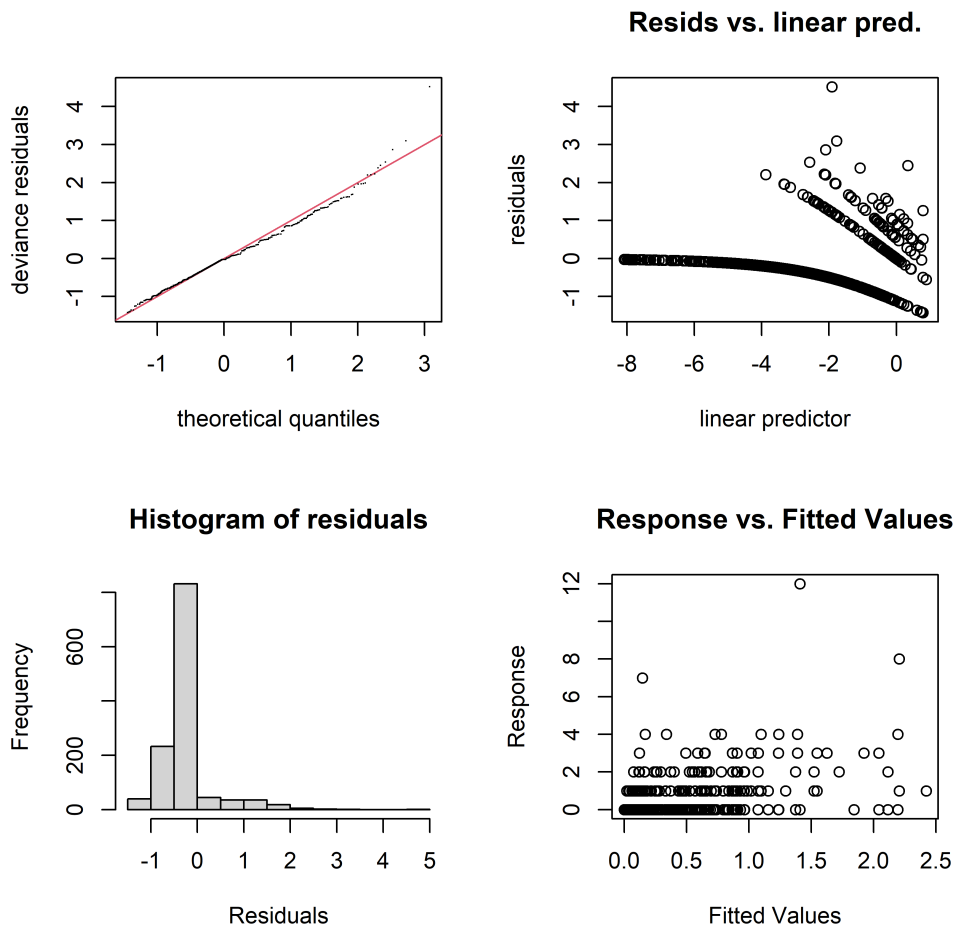

**Supporting Online Information Appendix A Figure 2.** Diagnostic plots of individual parameters for spatial GAM with a negative binomial distribution fitted with soap film model formulation to the 'Ākepa *Loxops coccineus* count data for the 2002 survey. Diagnostic are QQ-plot (top left panel), residuals versus linear predictor (top right panel), histogram of residuals (bottom left panel), and response versus fitted values (bottom right panel).

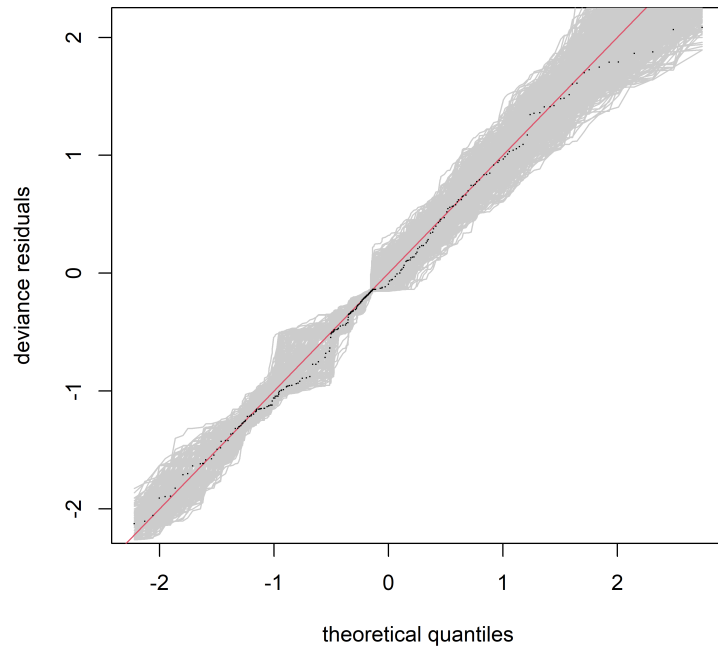

**Supporting Online Information Appendix A Figure 3.** Sorted deviance residuals (black line) for the spatial GAM against theoretical quantiles (grey lines; 1,000 replicates) fitted to the 2002 'Ākepa *Loxops coccineus* count data for the negative binomial distribution with the soap film model formulation.

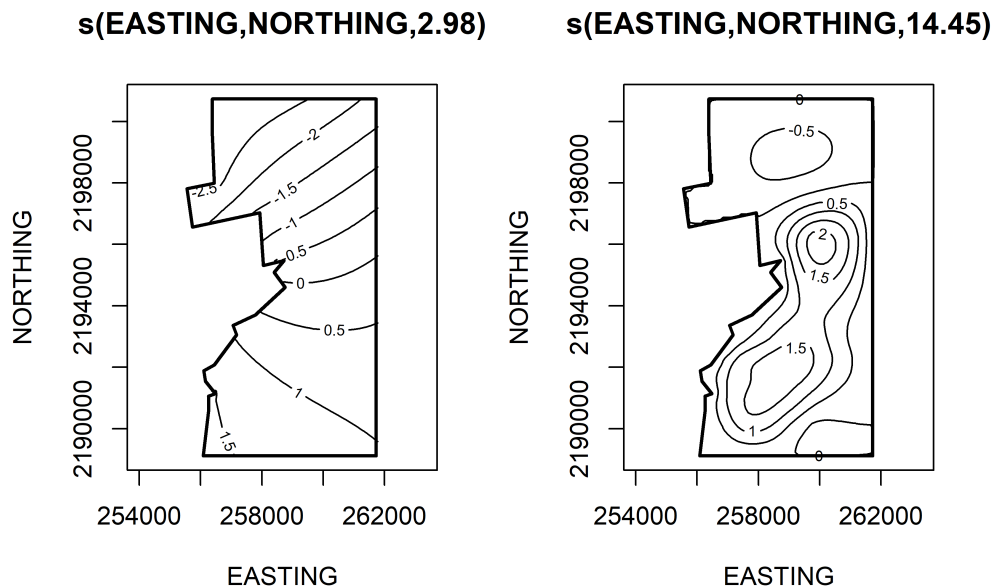

**Supporting Online Information Appendix A Figure 4.** Estimated model terms for the spatial soap film fitted to the 'Ākepa *Loxops coccineus* count data. The 2D contour plots represent 0.5 unit change are shown as blue lines and the EDF is provided in the plot panel title. Estimates provided on the scale of the link function.

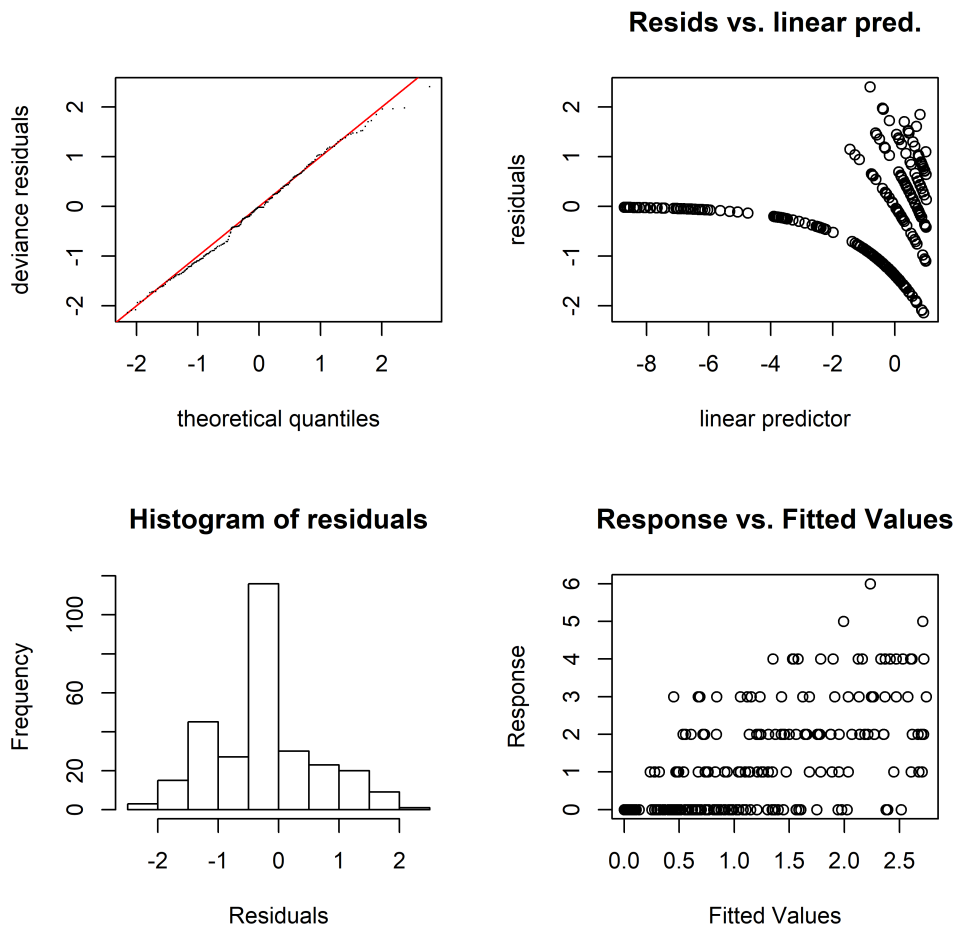

**Supporting Online Information Appendix A Figure 5.** Diagnostic plots of individual parameters for spatial GAM with a negative binomial distribution fitted with the TPRS model formulation to the 'ākepa *Loxops coccineus* count data for the 2002 survey. Diagnostic are QQ-plot (top left panel), residuals versus linear predictor (top right panel), histogram of residuals (bottom left panel), and response versus fitted values (bottom right panel).

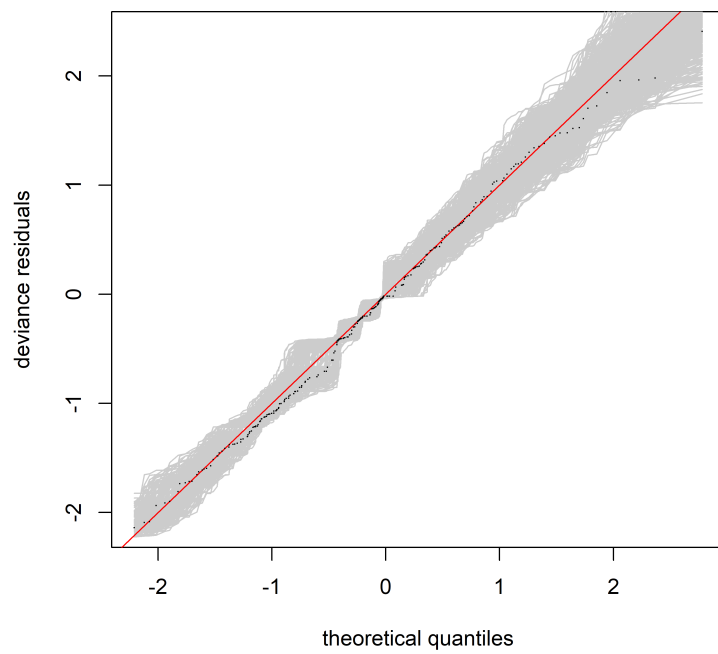

**Supporting Online Information Appendix A Figure 6.** Sorted deviance residuals (black line) for the spatial GAM against theoretical quantiles (grey lines; 1,000 replicates) fitted to the 2002 'Åkepa *Loxops coccineus* count data for the negative binomial distribution with the TPRS model formulation.

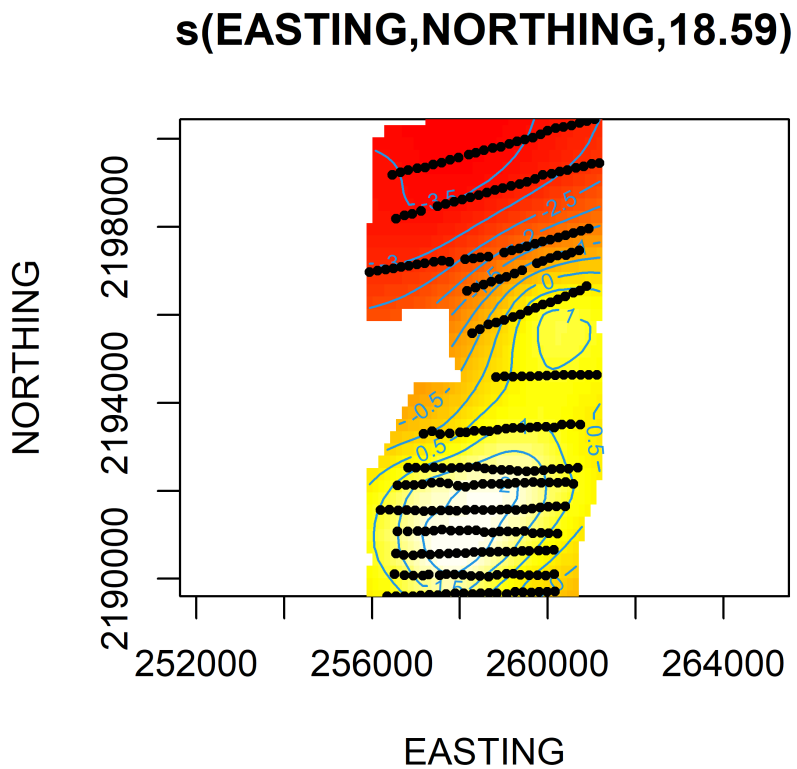

**Supporting Online Information Appendix A Figure 7.** Estimated model terms for the spatial TPRS fitted to the 'Ākepa *Loxops coccineus* count data. The locations of the points are plotted as black dots on the 2D contour plots and the EDF is provided in the plot panel title. Contours represent 0.5 unit change and are shown as blue lines. Estimates provided on the scale of the link function.

555 **Supporting Online Information Appendix B**

556 R code for spatial soap film model fitted to counts with an offset accounting for detectability while  
557 controlling the boundary behaviour to produce a density surface. We specified the basis in two parts to  
558 ensure adequate complexity for both the boundary and interior smoother components.

```
559 # Load domain boundary, which is a list of two columns giving the
560 # coordinates of points defining the boundary
561 bnd <- read.csv(filename, header=TRUE, fill=TRUE)
562
563 # Define the location of interior knots for the smooth
564 # set a regular grid with locations every 730m east and 670m north
565 # across the study area; this ensured that all knots are
566 # either inside or outside the boundary
567 gp <- expand.grid(EASTING=seq(from=255400, to=261500, by=730),
568                 NORTHING=seq(from=2189000, to=2200800, by=670))
569 names(bnd[[1]]) <- c("EASTING", "NORTHING", "f")
570 knots <- gp[with(gp, inSide(bnd, EASTING, NORTHING)), ]
571
572 # Soap film model
573 SF <- gam(Count ~ s(EASTING, NORTHING, k=20, bs="sf",
574                   xt=list(bnd=bnd, nmax=nmax)) +
575         s(EASTING, NORTHING, k=20, bs="sw",
576         xt=list(bnd=bnd, nmax=nmax)) +
577         offset(log(nu)),
578         family=nb(),
579         data=data,
580         method="REML",
581         knots=knots)
```

582 The effective area searched,  $v$ , was calculated as the truncation distance squared times  $\pi$  times the  
583 detection probability. We specified the boundary and interior basis arguments for the soap film smooth  
584 separately. An alternative formulation is to use the `bs="so"` argument. This construct is a wrapper for  
585 the boundary and interior smooths. While the `bs="so"` construct is easier to use, it does not allow for  
586 checking that sufficiently large basis complexity has been selected for each soap film component.



587 **Supporting Online Information Appendix C**

588 Hazard-rate detection function diagnostic plots indicated that the model adequately fit the data (Supporting Online Information Appendix C Fig. 1).

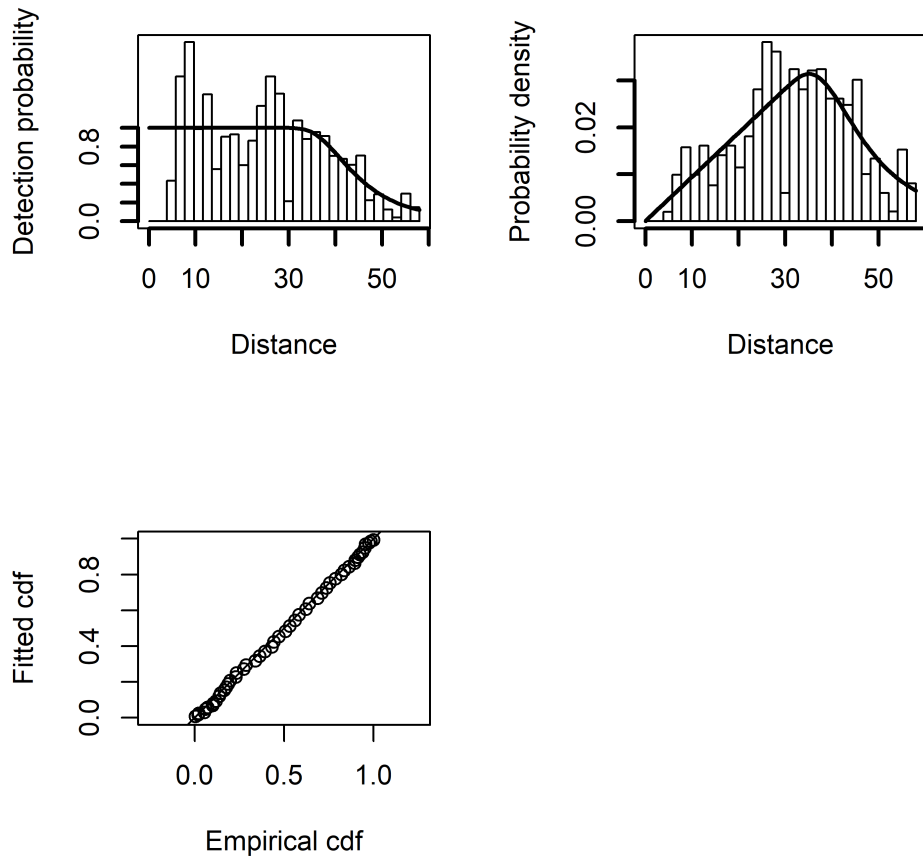

**Supporting Online Information Appendix C Figure 1.** Detection function plots for the hazard-rate model without series expansion or covariates fitted to the 2002 'Ākepa *Loxops coccineus* detections in the forest stratum. Plots represent the average detection probability (left top panel), probability density (right top panel) and QQ-plot (bottom panel). There is moderate deviation in the histogram in the probability plots and the points seem to fall about the straight line of the QQ-plot, which provides evidence the function adequately fits the data.

589
